# Supplementary material for: Overexpression of stathmin1 in the diffuse type of gastric cancer and its roles in proliferation and migration of gastric cancer cells
Source: PubMed Central journal article supplement (PMC2837578; doi:10.1038/sj.bjc.6605537), 2010-01-19

# Supplementary Figure 1

**A**

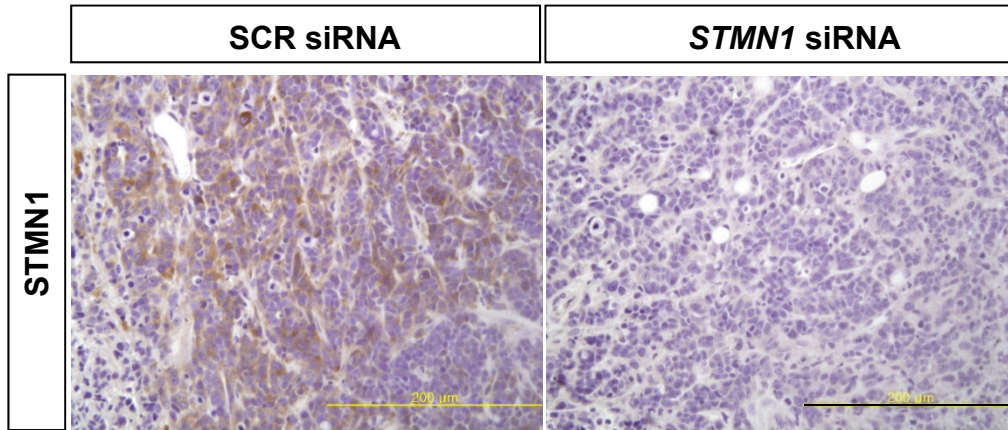

**B**

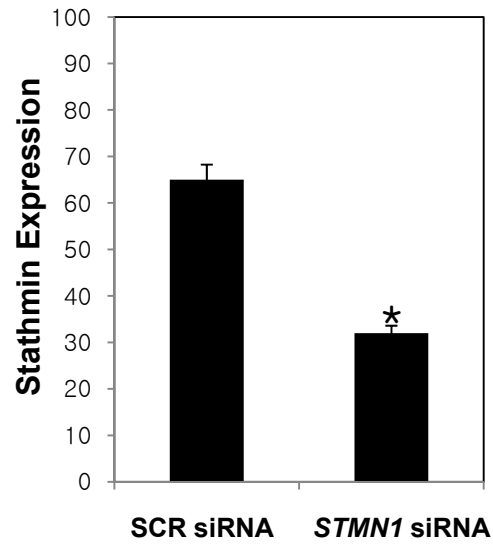

## Supplementary Figure 2

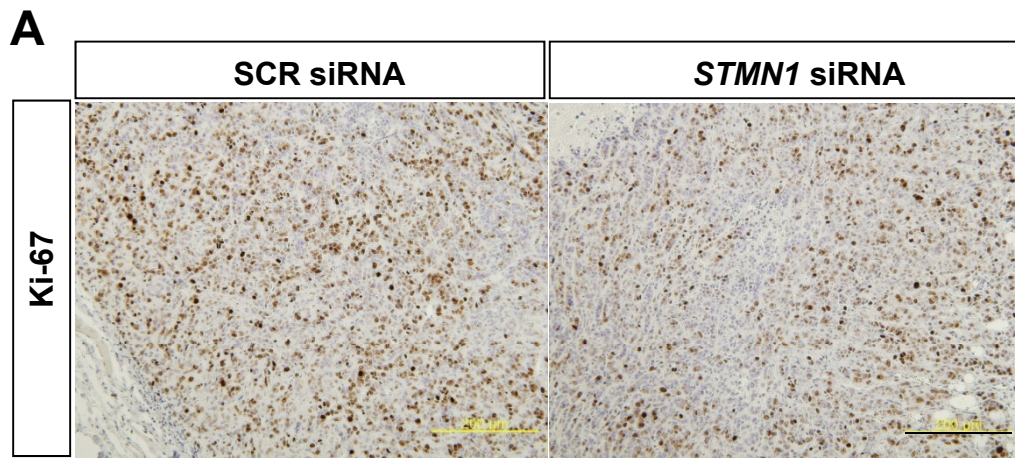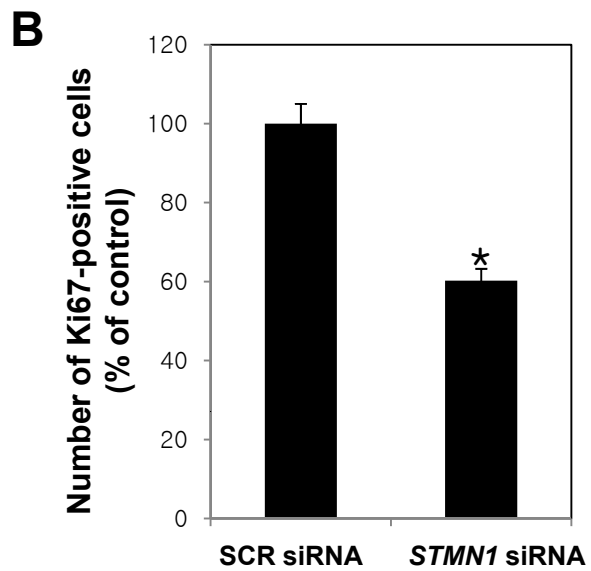

### Supplementary Figure 3

**A**

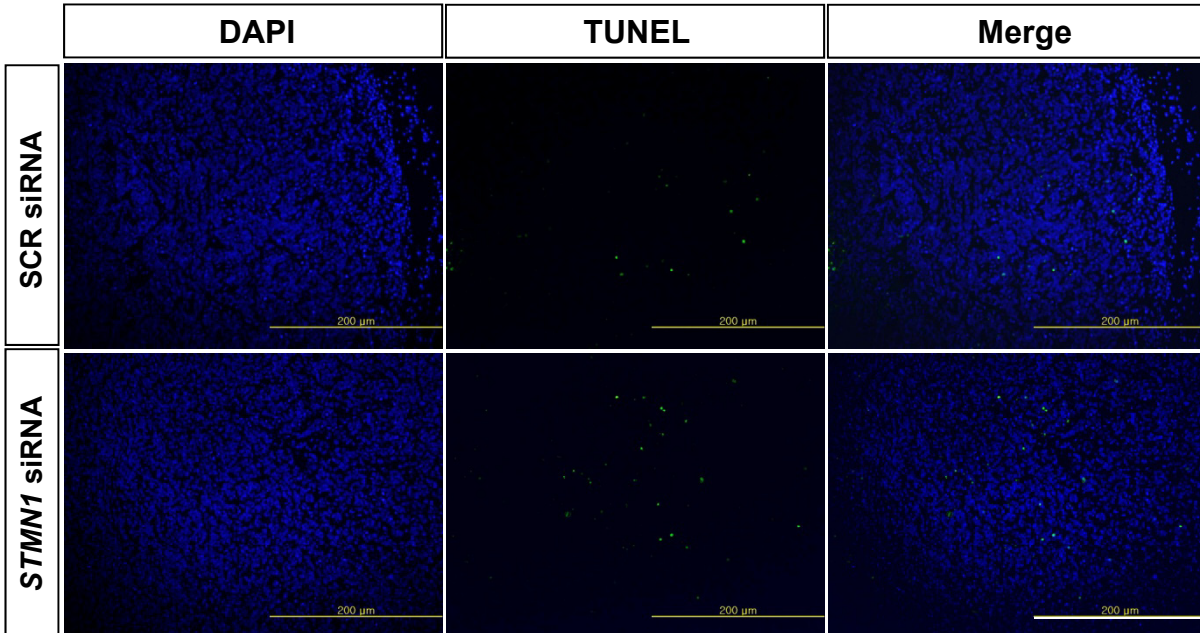

**B**

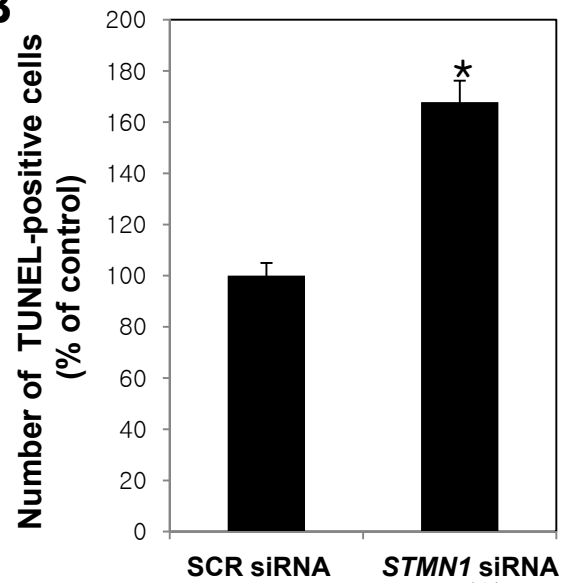

Supplement: 6605537x1.pdf [file 6605537x1.pdf]
